# Supplementary material for: Prognostic Stratification of Advanced Gastric Signet Ring Cell Carcinoma by Clinicopathological Factors and GALNT14 Genotype
Source: PubMed Central journal article supplement — J Cancer. 2018 Sep 8;9(19):3540–7. doi: 10.7150/jca.26293 (PMC6171017; doi:10.7150/jca.26293), 2018-09-08

**Supplement Table 1.** Baseline clinicopathological factors of 347 patients included

| Parameters                      |                   | p <sup>b</sup> |
|---------------------------------|-------------------|----------------|
| Age (years), mean $\pm$ SD      | 57.96 $\pm$ 13.79 |                |
| Gender                          |                   | 0.2877         |
| Male                            | 181 (52.2%)       |                |
| Female                          | 166 (47.8%)       |                |
| Tumor size (cm), mean $\pm$ SD  | 4.38 $\pm$ 3.61   |                |
| Tumor (T) stage                 |                   | < 0.0001       |
| T1                              | 109 (31.41%)      |                |
| T2                              | 51 (14.70%)       |                |
| T3                              | 155 (44.67%)      |                |
| T4                              | 32 (9.22%)        |                |
| Lymph node (N) stage            |                   | < 0.0001       |
| N0                              | 172 (49.57%)      |                |
| N1                              | 96 (27.67%)       |                |
| N2                              | 67 (19.31%)       |                |
| N3                              | 12 (3.46%)        |                |
| Metastasis (M) stage            |                   | < 0.0001       |
| M0                              | 341 (98.27%)      |                |
| M1                              | 6 (1.73%)         |                |
| Lymphatic invasion <sup>a</sup> |                   | 0.0175         |
| No                              | 175/319 (54.86%)  |                |
| Yes                             | 144/319 (45.14%)  |                |
| Vascular invasion <sup>a</sup>  |                   | < 0.0001       |
| No                              | 282/319 (88.40%)  |                |

|                                   |                  |          |
|-----------------------------------|------------------|----------|
| Yes                               | 37/319 (11.60%)  |          |
| Perineural invasion <sup>a</sup>  |                  | 0.8743   |
| No                                | 158/319 (49.53%) |          |
| Yes                               | 161/319 (50.47%) |          |
| <i>GALNT14-rs9679162</i> genotype |                  | < 0.0001 |
| “TT”                              | 81 (23.34%)      |          |
| “TG”                              | 207 (59.65%)     |          |
| “GG”                              | 59 (17.00%)      |          |
| TNM Stage (AJCC 7 <sup>th</sup> ) |                  | < 0.0001 |
| IA                                | 100 (28.82%)     |          |
| IB                                | 37 (10.66%)      |          |
| IIA                               | 51 (14.70%)      |          |
| IIB                               | 67 (19.31%)      |          |
| IIIA                              | 56 (16.14%)      |          |
| IIIB                              | 22 (6.34%)       |          |
| IIIC                              | 8 (2.31%)        |          |
| IV                                | 6 (1.73%)        |          |
| Location of cancer                |                  | < 0.0001 |
| Lesser curvature                  | 106/415 (25.54%) |          |
| Prepyloric                        | 237/415 (57.11%) |          |
| Proximal cardioesophageal         | 51/415 (12.29%)  |          |
| Diffuse                           | 18/415 (4.34%)   |          |
| unknown                           | 3/415 (0.72%)    |          |

Overall Survival Rate

|                                   |                  |
|-----------------------------------|------------------|
| One-year                          | 77.81%           |
| Two-year                          | 66.28%           |
| Three-year                        | 58.21%           |
| Five-year                         | 48.13%           |
| Ten-year                          | 30.26%           |
| Follow-up (months), median, range | 32.83 (0.4, 254) |

---

<sup>a</sup>Missing data; data available in 319 patients

<sup>b</sup>Comparisons between subgroups

**Supplement Table 2.** Baseline Clinicopathological factors of 159 patients in group-3 (advanced SRCC patients).

| Parameters                      |                   | p <sup>b</sup> |
|---------------------------------|-------------------|----------------|
| Age (years), mean $\pm$ SD      | 59.05 $\pm$ 14.13 |                |
| Gender                          |                   | 0.2620         |
| Male                            | 85 (53.46%)       |                |
| Female                          | 74 (46.54%)       |                |
| Tumor size (cm), mean $\pm$ SD  | 4.38 $\pm$ 3.61   |                |
| Tumor (T) stage                 |                   | < 0.0001       |
| T1                              | 0 (0%)            |                |
| T2                              | 7 (4.40%)         |                |
| T3                              | 120 (46.54%)      |                |
| T4                              | 32 (20.13%)       |                |
| Lymph node (N) stage            |                   | < 0.0001       |
| N0                              | 8 (5.03%)         |                |
| N1                              | 74 (46.54%)       |                |
| N2                              | 65 (40.88%)       |                |
| N3                              | 12 (7.55%)        |                |
| Metastasis (M) stage            |                   | < 0.0001       |
| M0                              | 151/157 (96.18%)  |                |
| M1                              | 6/157 (3.82%)     |                |
| Lymphatic invasion <sup>a</sup> |                   | < 0.0001       |
| No                              | 33/154 (21.43%)   |                |
| Yes                             | 121/154 (78.57%)  |                |
| Vascular invasion <sup>a</sup>  |                   | < 0.0001       |

|                                     |                  |          |
|-------------------------------------|------------------|----------|
| No                                  | 122/154 (79.22%) |          |
| Yes                                 | 32/154 (20.78%)  |          |
| Perineural invasion <sup>a</sup>    |                  | < 0.0001 |
| No                                  | 33/154 (21.43%)  |          |
| Yes                                 | 121/154 (78.57%) |          |
| GALNT14-rs9679162 genotype          |                  | < 0.0001 |
| “TT”                                | 39 (24.53%)      |          |
| “TG”                                | 91 (57.23%)      |          |
| “GG”                                | 29 (18.24 %)     |          |
| Tumor Stage (AJCC 7 <sup>th</sup> ) |                  | < 0.0001 |
| IIB                                 | 67 (42.14%)      |          |
| IIIA                                | 56 (35.22%)      |          |
| IIIB                                | 22 (13.84%)      |          |
| IIIC                                | 8 (5.03%)        |          |
| IV                                  | 6 (3.77%)        |          |
| Location of cancer                  |                  | < 0.0001 |
| Lesser curvature                    | 51/269 (18.96%)  |          |
| Prepyloric                          | 156/269 (57.99%) |          |
| Proximal cardioesophageal           | 44/269 (16.36%)  |          |
| Diffuse                             | 16/269 (5.95%)   |          |
| unknown                             | 2/269 (0.74%)    |          |
| Overall survival rate               |                  |          |
| One-year                            | 61.64%           |          |
| Two-year                            | 42.14%           |          |

|                                   |                    |
|-----------------------------------|--------------------|
| Three-year                        | 33.33%             |
| Five-year                         | 23.27%             |
| Ten-year                          | 10.69%             |
| Follow-up (months), median, range | 19.07 (0.4, 205.3) |

---

<sup>a</sup>Missing data; data available in 154 patients

<sup>b</sup>Comparisons between subgroups

**Supplement Table 3.** Cox proportional hazard analysis for TTP in relation to clinical parameters in group-3 patients

| Variables                            | Cox proportional hazard analysis |        |       |              |       |        |        |         |
|--------------------------------------|----------------------------------|--------|-------|--------------|-------|--------|--------|---------|
|                                      | Univariate                       |        |       | Multivariate |       |        |        |         |
|                                      | HR                               | 95% CI |       | P            | HR    | 95% CI |        | P       |
| Size                                 | 1.056                            | 1.024  | 1.090 | 0.0005       | 1.056 | 1.021  | 1.093  | 0.0017  |
| Age                                  | 1.021                            | 1.009  | 1.034 | 0.0007       |       |        |        |         |
| Sex                                  | 1.200                            | 0.877  | 1.642 | 0.2552       |       |        |        |         |
| T status                             | 1.226                            | 0.877  | 1.714 | 0.0001       |       |        |        |         |
| N status                             | 1.418                            | 1.122  | 1.793 | 0.0035       | 1.661 | 1.29   | 2.14   | <0.0001 |
| M status                             | 3.711                            | 1.608  | 8.566 | 0.0021       | 4.522 | 1.765  | 11.582 | 0.0017  |
| Lymphatic invasion                   | 1.587                            | 1.071  | 2.350 | 0.0212       |       |        |        |         |
| Vascular invasion                    | 1.449                            | 0.977  | 2.150 | 0.0655       |       |        |        |         |
| Perineural invasion                  | 1.573                            | 1.065  | 2.325 | 0.0229       | 1.5   | 0.984  | 2.287  | 0.0596  |
| <i>GALNT14</i> genotype <sup>a</sup> | 1.549                            | 1.074  | 2.236 | 0.0193       | 1.489 | 0.966  | 2.294  | 0.0710  |

HR, hazard ratio; CI, confidence interval; <sup>a</sup>*GALNT14-rs9679162* genotype: divided into “TT” versus “non-TT”; “TT” = 1.

**Supplement Figure 1.** The plot overlaying the subgroups of group-3 with different risk scores and the TNM stage IA (group-1) and IB/IIA (group-2) curves. Group-3: score = 1, red line; score = 2, purple line; score = 3, brown-green line; TNM stage: IA, light green line; IB/IIA, brown line; All other stages combined (Group-3 total), dark green line.

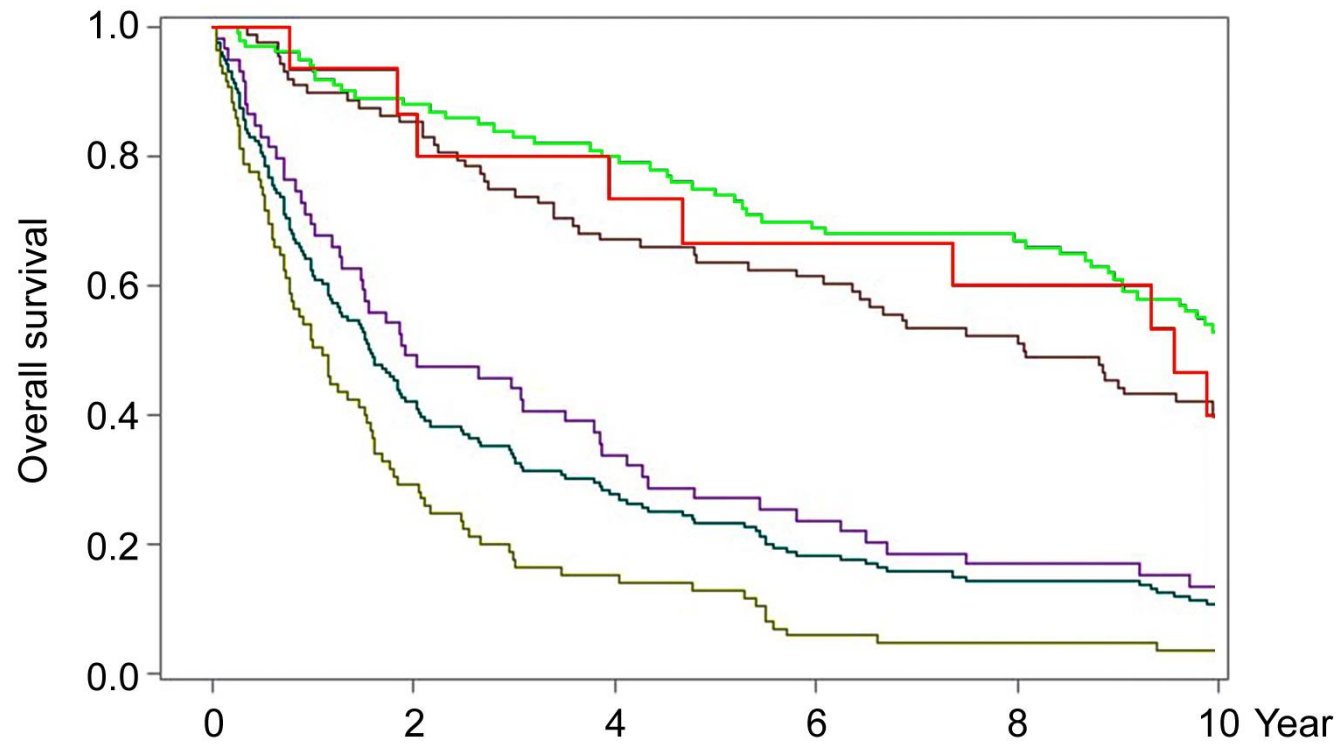



**Supplement Figure 2.** The disease-free survival of all patients (A) and Group-3 patients (B) could be divided into 3 prognostic subgroups: score = 0/1, blue; score = 2/3, red; and score > 3, green

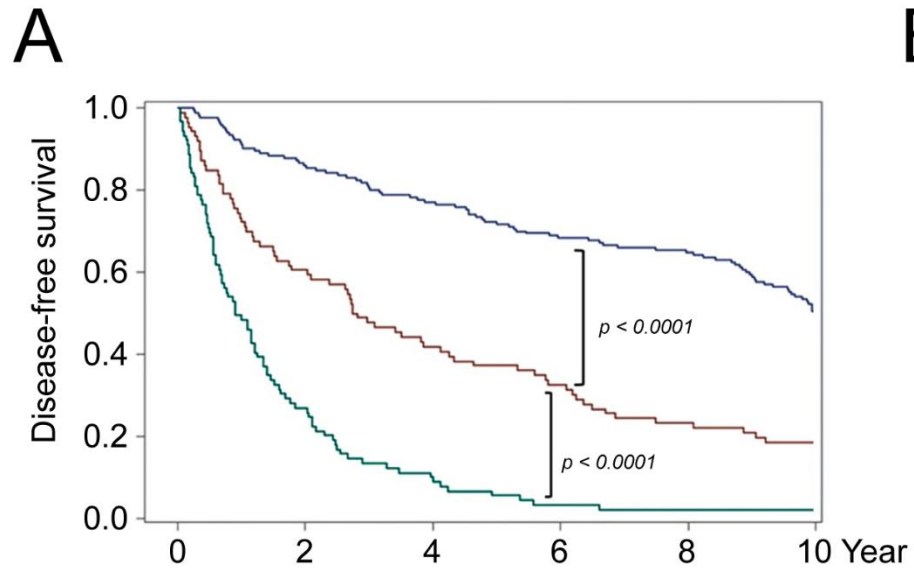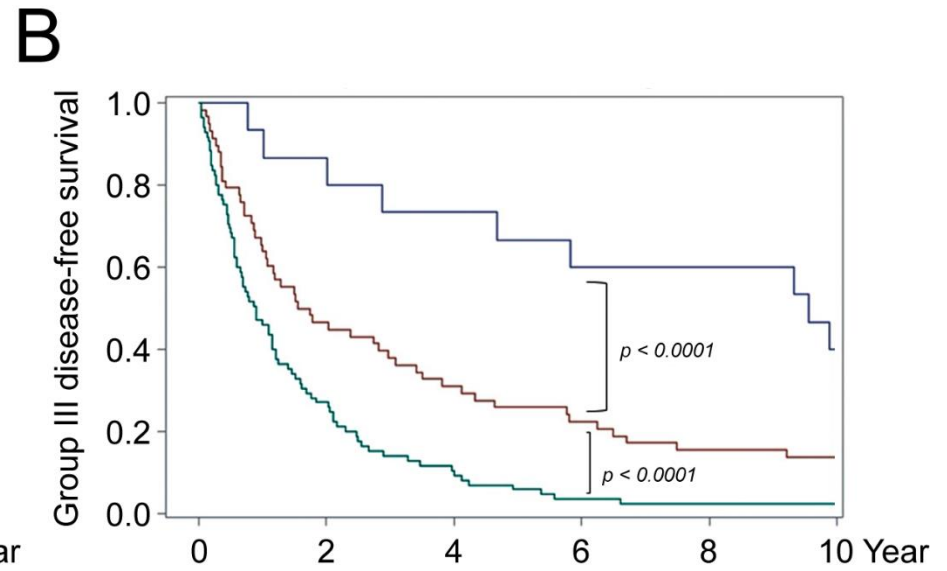

Supplement: jcav09p3540s1.pdf [file jcav09p3540s1.pdf]
